# Supplementary material for: Electrically modulated reversible dual-spin filter in zigzag β-SiC7 nanoribbons
Source: Royal Society of Chemistry journal article supplement (doi:10.1039/d2cp03379h), 2022-01-01
Supplement: d2cp03379h1.pdf [file d2cp03379h1.pdf]

## Supplementary Information

Table S1: cartesian coordinates of the  $\beta$ -SiC<sub>7</sub> cell

| Element | x(Å)       | y(Å)       | z(Å) |
|---------|------------|------------|------|
| Carbon  | 0.7090258  | 0.95323794 | 5    |
| Carbon  | 3.3434514  | 3.7404826  | 5    |
| Carbon  | 4.4902877  | 2.9190529  | 5    |
| Carbon  | 4.5954874  | 1.4910524  | 5    |
| Silicon | 0.70824057 | 3.7938571  | 5    |
| Carbon  | 2.1964201  | 2.9191259  | 5    |
| Carbon  | 2.0924904  | 1.4910753  | 5    |
| Carbon  | 3.3439942  | 0.67284241 | 5    |

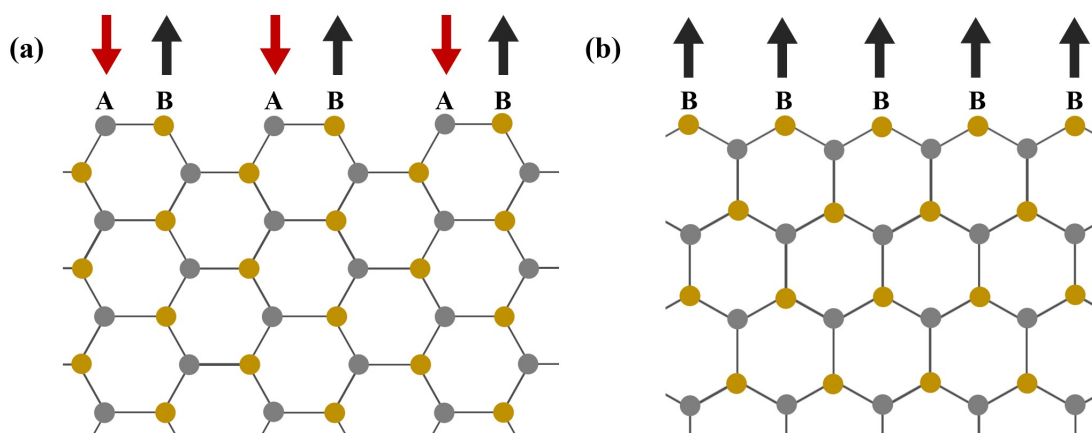

**Figure S1.** Schematic diagrams of the sublattice symmetry of (a) armchair and (b) zigzag edges. The circles represent sites and the up- and down-arrows indicate spins.

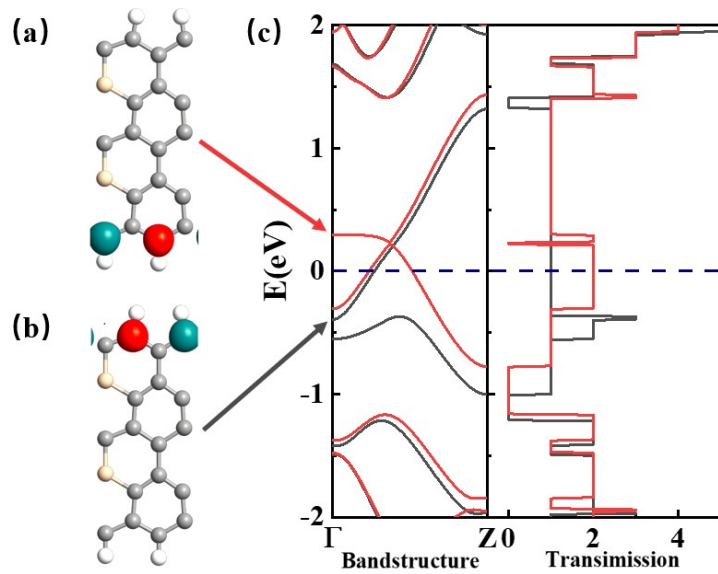

**Figure S2.** (a)-(b) Isosurface plots of the  $\Gamma$ -point wave functions of the two nearest subbands to  $E_F$ . (c) Spin-dependent band structure and transmission spectrum of 5-ZCC in the FM state.

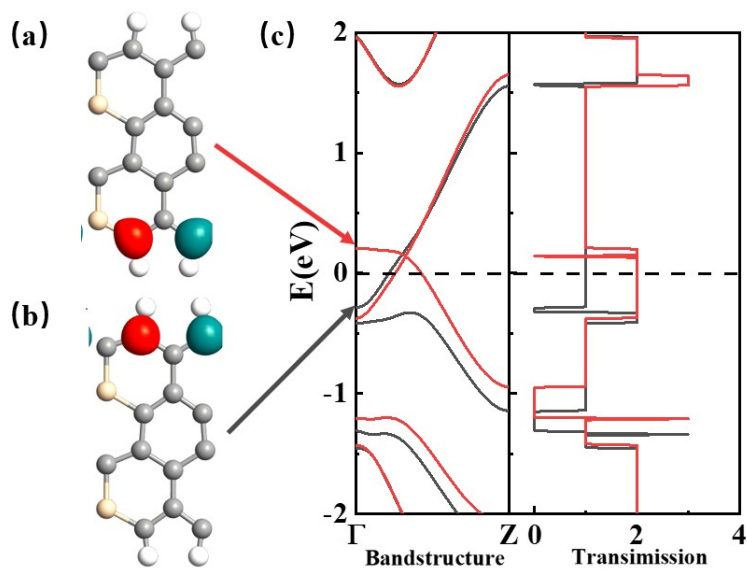

**Figure S3.** (a)-(b) Isosurface plots of the  $\Gamma$ -point wave functions of the two nearest subbands to  $E_F$ . (c) Spin-dependent band structure and transmission spectrum of 4-ZCSi in the FM state.

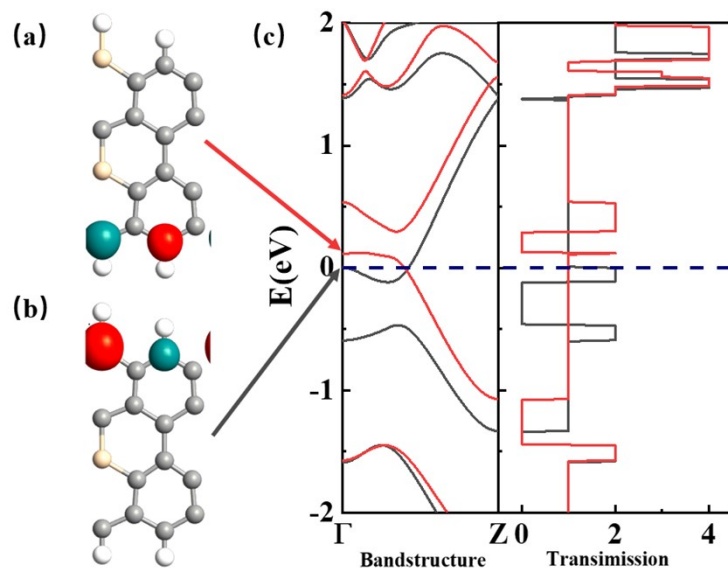

**Figure S4.** (a)-(b) Isosurface plots of the  $\Gamma$ -point wave functions of the two nearest subbands to  $E_F$ . (c) Spin-dependent band structure and transmission spectrum of 4-ZSiC in the FM state.

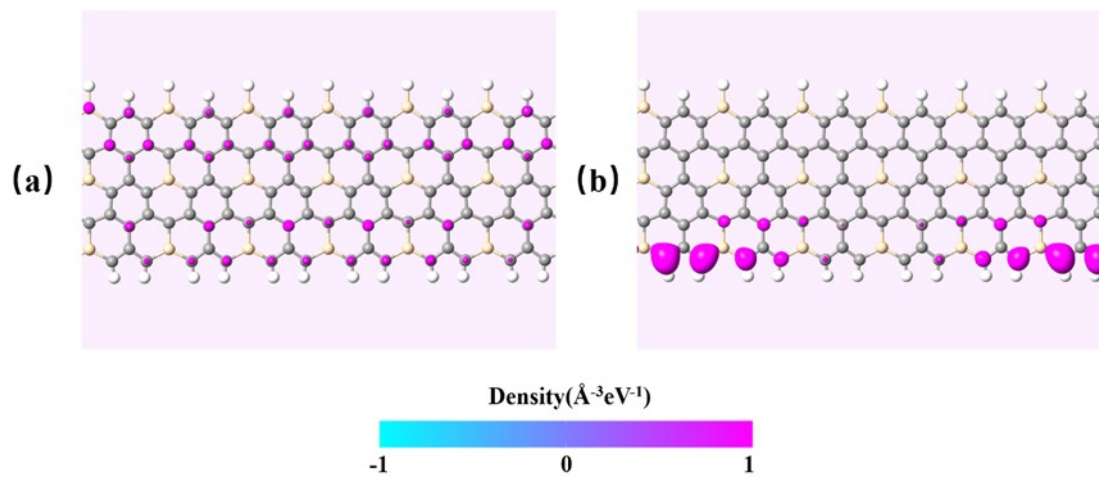

**Figure S5.** The LDOS of the 5-ZSiSi system at  $E_F$  is a gate voltage of 0.9 V. The left column indicates spin up and the right column shows spin down.

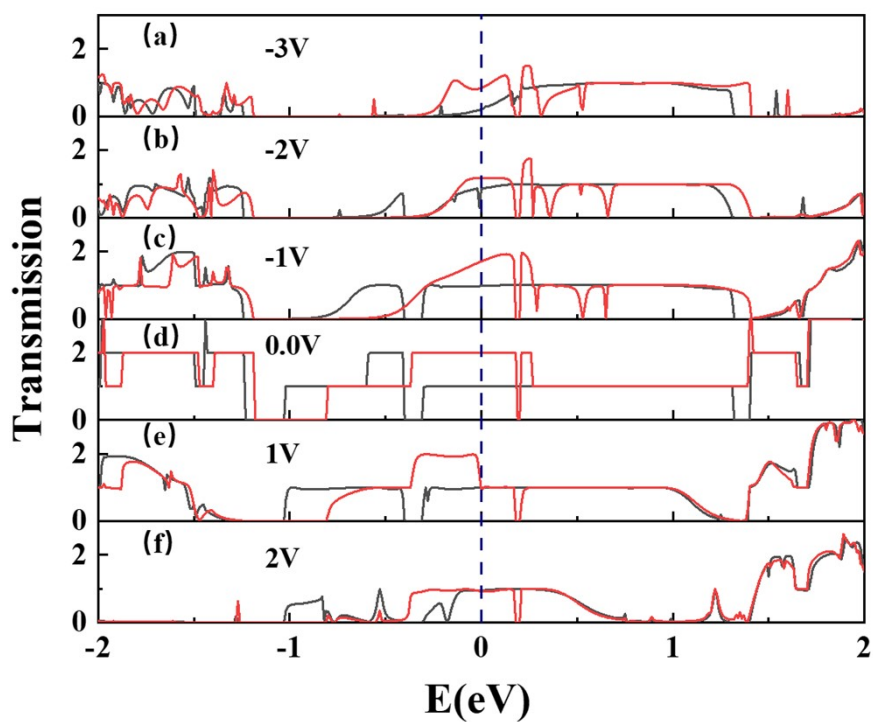

**Figure S6.** (a)–(f) The transmission spectra of the three-terminal 5-ZCC system at different  $V_g$ , which is denoted in each case.

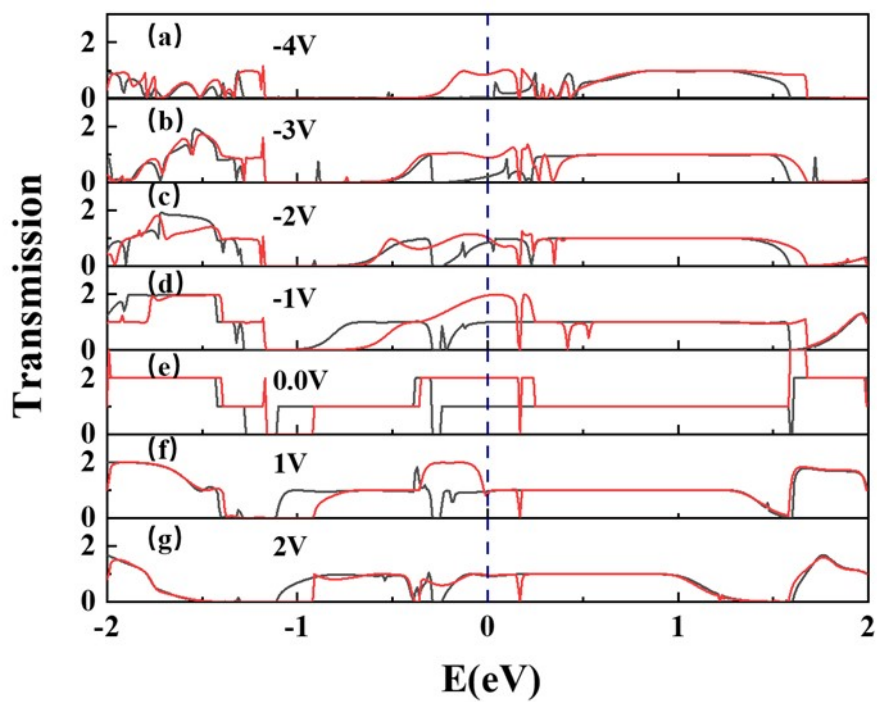

**Figure S7.** (a)–(g) The transmission spectra of the three-terminal 4-ZCSi system at different  $V_g$ , which is denoted in each case.

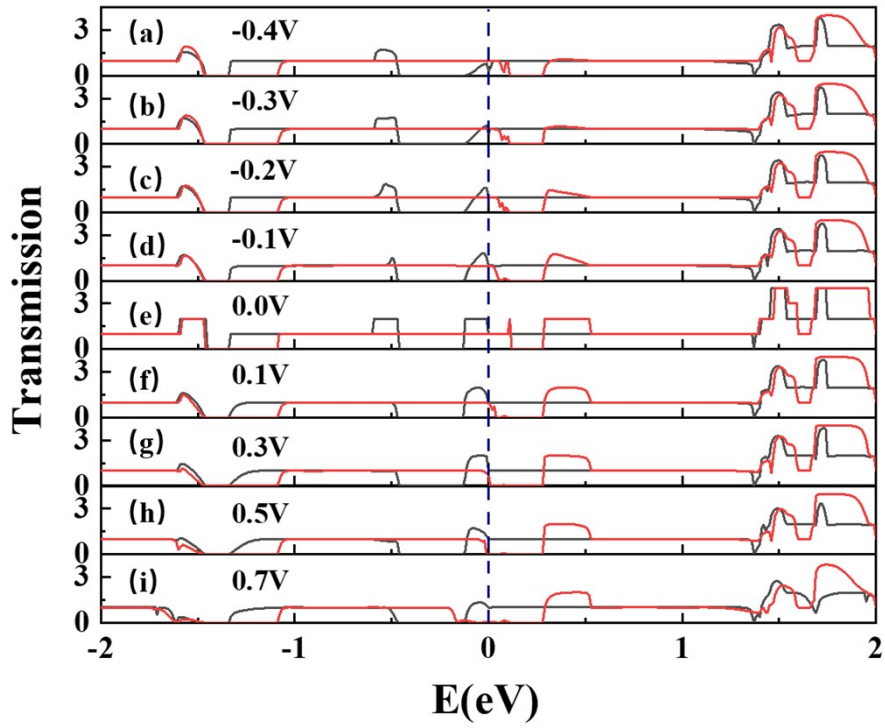

**Figure S8.** (a)–(i) The transmission spectra of the three-terminal 4-ZSiC system at different  $V_g$ , which is denoted in each case.

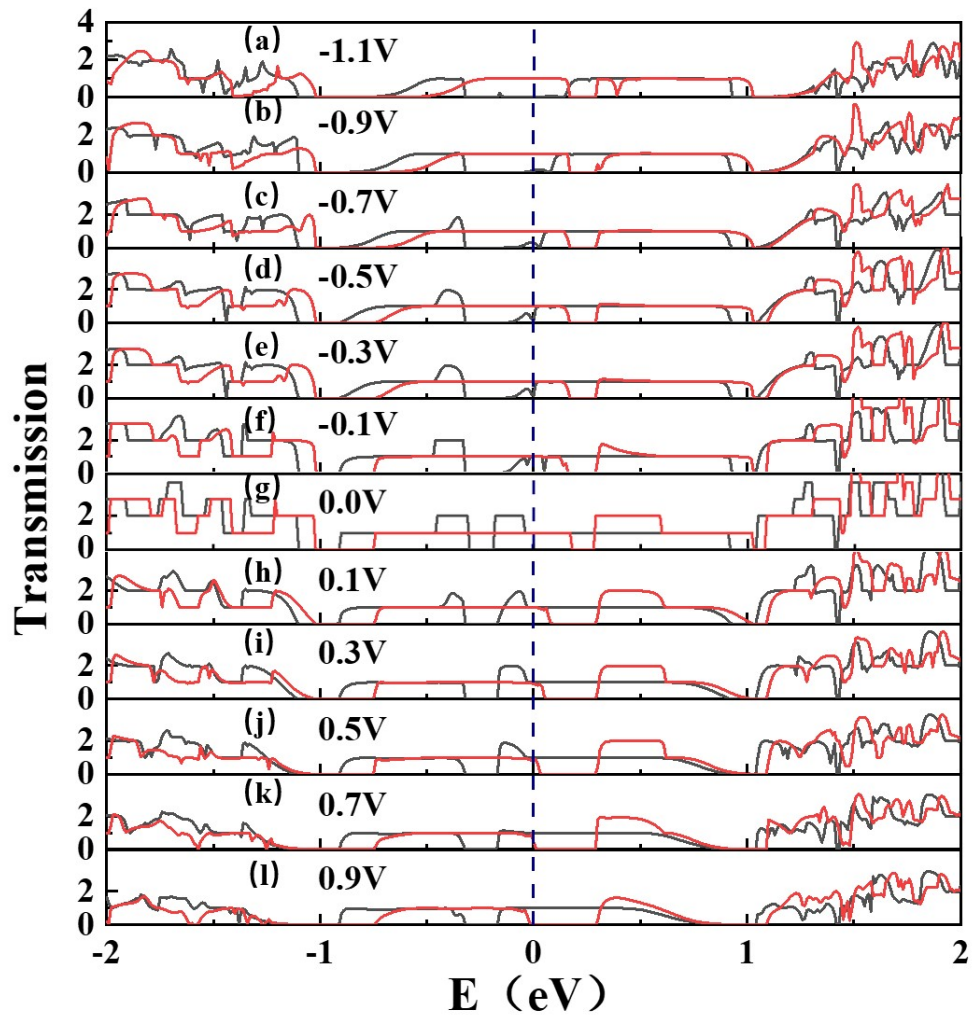

**Figure S9.** (a)–(l) The transmission spectra of the three-terminal 7-ZSiSi system at different  $V_g$ , which is denoted in each case.
